# Supplementary figures and images for: Accreditation as a path to achieving universal quality health coverage
Source: Springer Nature journal article supplement (doi:10.1186/s12992-014-0068-6), 2014-10-16

**Figure 3: Four Dimension of Universal Quality Coverage**


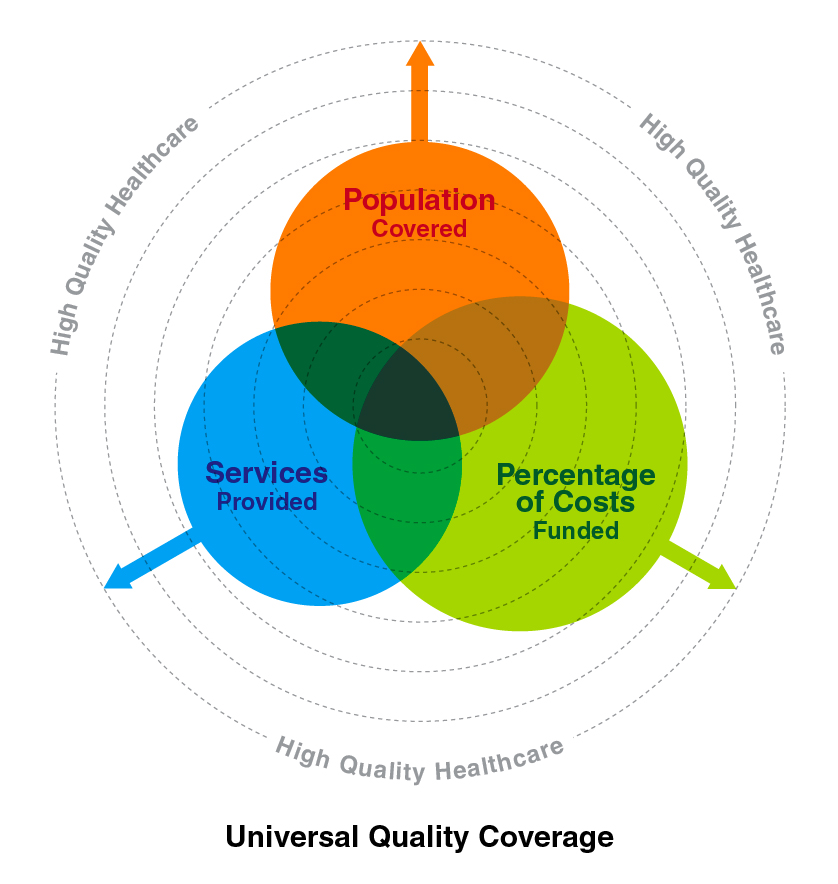

Supplement: MOESM3 [file 9770978]

**Figure 4: Reinforcing relationships between accreditation, financing and providers.**


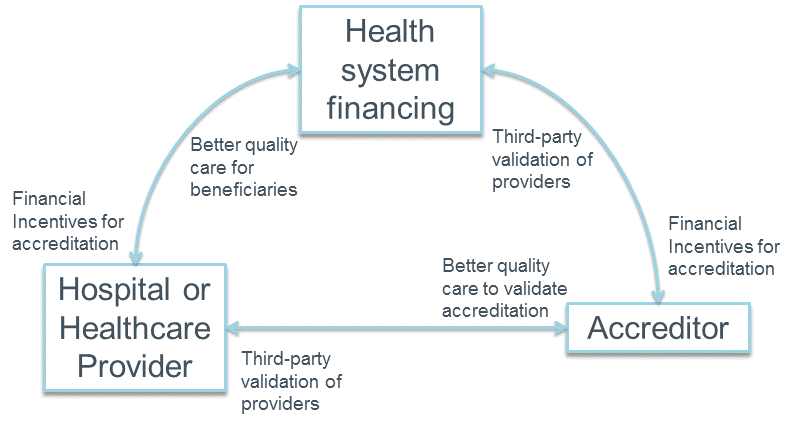

Supplement: MOESM4 [file 9770978]
